# Supplementary material for: Designed synthesis of hollow Co3O4 nanoparticles encapsulated in a thin carbon nanosheet array for high and reversible lithium storage
Source: Royal Society of Chemistry journal article supplement (doi:10.1039/c5ta01187f), 2015-01-01
Supplement: c5ta01187f1.pdf [file c5ta01187f1.pdf]

## Supporting Information

### Designed Synthesis of Hollow $\text{Co}_3\text{O}_4$ Nanoparticles Encapsulated in Thin Carbon Nanosheet Array for High and Reversible Lithium Storage

Liang Peng, Yangyang Feng, Yuanjuan Bai, Hua-Jun Qiu\*, Yu Wang\*

The State Key Laboratory of Mechanical Transmissions and School of Chemistry and Chemical Engineering, Chongqing University, Chongqing 400044, China

\*Email: wangy@cqu.edu.cn ([Y.W.](mailto:wangy@cqu.edu.cn));

hjqu@cqu.edu.cn ([H.J.Q.](mailto:hjqu@cqu.edu.cn))

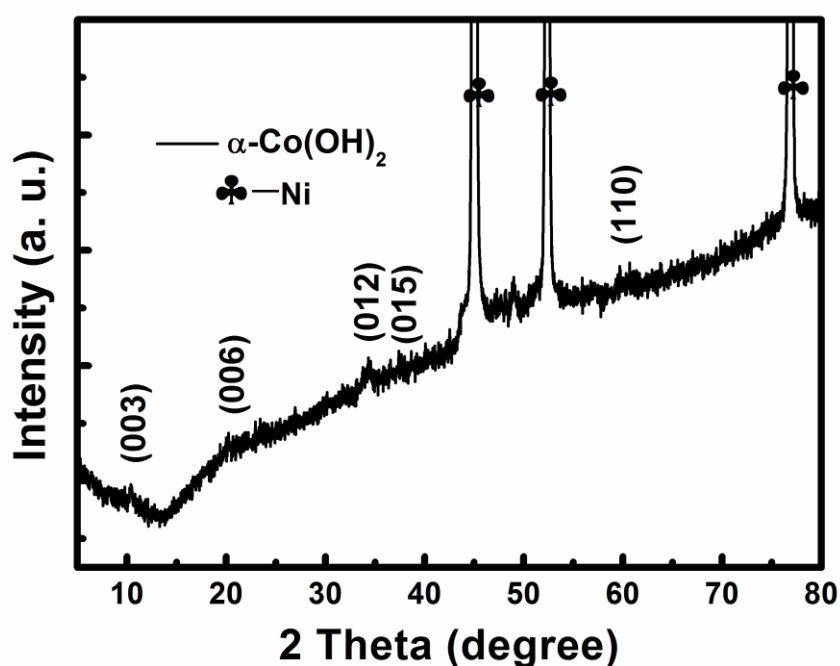

Figure S1. XRD pattern of the  $\text{Co(OH)}_2/\text{Ni}$  foam.

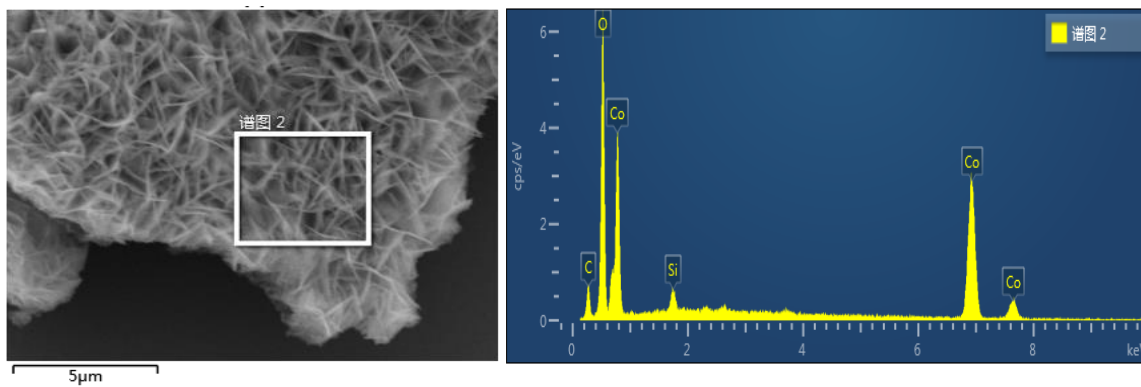

**Figure S2.** EDS result of the  $\text{Co}_3\text{O}_4$ /carbon nanosheet array.

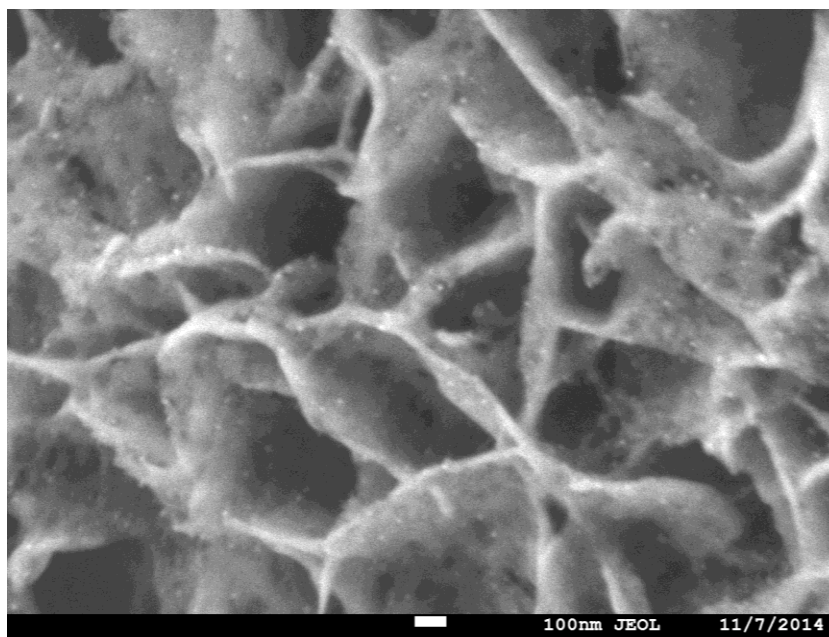

**Figure S3.** SEM image of the  $\text{Co}_3\text{O}_4$ /carbon nanosheet array after 100 charge-discharge cycles at 500 mAh/g.

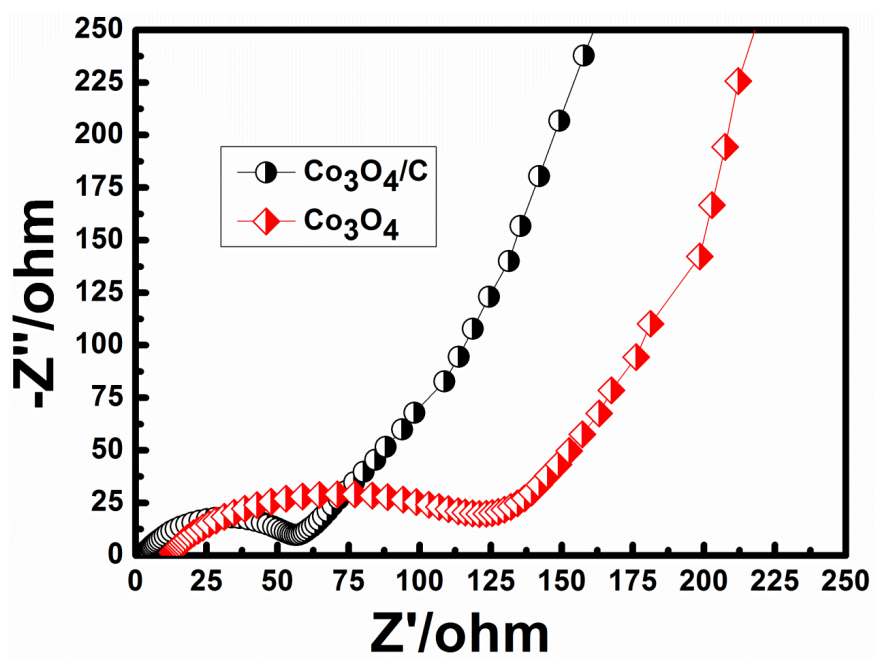

**Figure S4.** Electrochemical impedance spectra of the  $\text{Co}_3\text{O}_4/\text{carbon}$  nanosheet arrays and bare  $\text{Co}_3\text{O}_4$  NPs after 1<sup>st</sup> cycle.

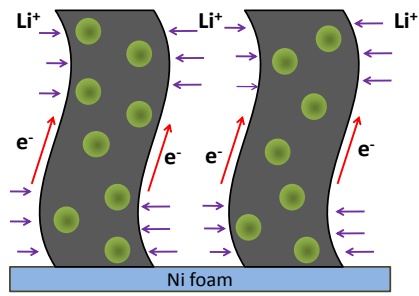

**Figure S5.** The mechanism illustrative image is presented to show the possible reason of the high Li storage performance for the  $\text{Co}_3\text{O}_4/\text{carbon}$  nanosheet array on Ni foam.

**Table S1.** The comparisons of the electrochemical performance of Co<sub>3</sub>O<sub>4</sub>/carbon nanosheets array with the reported results.

| Active nanomaterials                                                | Current density<br>(mA g <sup>-1</sup> ) | Cycle<br>number | Specific capacity<br>(mAh g <sup>-1</sup> ) | References |
|---------------------------------------------------------------------|------------------------------------------|-----------------|---------------------------------------------|------------|
| Cobalt oxide/graphene composites                                    | 74                                       | 20              | 800                                         | [1]        |
| Co <sub>3</sub> O <sub>4</sub> -carbon nanotube                     | 200                                      | 60              | 815                                         | [2]        |
| Foam-like freestanding Co <sub>3</sub> O <sub>4</sub><br>nanosheets | 150                                      | 50              | 631                                         | [3]        |
| Mesoporous CoNiO <sub>2</sub> nanosheets                            | 100                                      | 50              | 450                                         | [4]        |
| Mesoporous Co <sub>3</sub> O <sub>4</sub> nanobelt<br>array         | 177                                      | 25              | 789                                         | [5]        |
| Self-stacked Co <sub>3</sub> O <sub>4</sub> nanosheets              | 178                                      | 50              | 1010                                        | [6]        |
| Lemongrass-like Co <sub>3</sub> O <sub>4</sub>                      | 450                                      | 100             | 981                                         | [7]        |
| Chrysanthemum-like Co <sub>3</sub> O <sub>4</sub><br>architectures  | 50                                       | 20              | 400                                         | [8]        |
| Porous Co <sub>3</sub> O <sub>4</sub> nanoplates                    | 200                                      | 50              | 750                                         | [9]        |
| Hollow Co <sub>3</sub> O <sub>4</sub> /carbon nanosheets<br>array   | 100                                      | 100             | 1052                                        | This work  |

1. S. Yang, G. Cui, S. Pang, Q. Cao, U. Kolb, X. Feng, J. Maier and K. Mullen, *ChemSuschem*, 2010, **3**, 236-239.
2. L. Zhuo, Y. Wu, J. Ming, L. Wang, Y. Yu, X. Zhang and F. Zhao, *J. Mater. Chem. A*, 2013, **1**, 1141.
3. Y. Fan, H. Shao, J. Wang, L. Liu, J. Zhang and C. Cao, *Chem. Commun.*, 2011, **47**, 3469-3471.
4. Y. Liu, Y. Zhao, Y. Yu, J. Li, M. Ahmad and H. Sun, *New J. Chem.*, 2014, **38**, 3084.
5. Y. Wang, H. Xia, L. Lu and J. Y. Lin, *ACS Nano*, 2010, **4**, 1425-1432.
6. X. Wang, H. Guan, S. M. Chen, H. Q. Li, T. Y. Zhai, D. M. Tang, Y. Bando and D. Golberg, *Chem. Commun.*, 2011, **47**, 12280-12282.
7. Y. J. Fu, X. W. Li, X. L. Sun, X. H. Wang, D. Q. Liu and D. Y. He, *J. Mater. Chem.*, 2012, **22**, 17429-17431.
8. M. Ren, S. Yuan, L. Su and Z. Zhou, *Solid State Sci.*, 2012, **14**, 451-455.
9. Q. M. Su, J. Zhang, Y. S. Wu and G. H. Du, *Nano Energy*, 2014, **9**, 264-272.
